# Supplementary material for: Chloroplast Sec14-like 1 (CPSFL1) is essential for normal chloroplast development and affects carotenoid accumulation in Chlamydomonas
Source: PubMed Central journal article supplement — Proc Natl Acad Sci U S A. 2020 May 13;117(22):12452–63. doi: 10.1073/pnas.1916948117 (PMC7275715; doi:10.1073/pnas.1916948117), 2020-05-13
Supplement: pnas.1916948117.sapp.pdf [file pnas.1916948117.sapp.pdf]

# PNAS

www.pnas.org

Supplementary Information for

**Chloroplast Sec14-like 1 (CPSFL1) is essential for normal chloroplast development and affects carotenoid accumulation in *Chlamydomonas reinhardtii***

José G. García-Cerdán<sup>1,2§\*</sup>, Eva M. Schmid<sup>3</sup>, Tomomi Takeuchi<sup>4</sup>, Ian McRae<sup>2</sup>, Kent McDonald<sup>5</sup>, Nichakarn Yordduangjun<sup>6</sup>, Ahmed M. Hassan<sup>11</sup>, Patricia Grob<sup>1,6</sup>, C. Shan Xu<sup>7</sup>, Harald F. Hess<sup>7</sup>, Daniel A. Fletcher<sup>3,8,9,10</sup>, Eva Nogales<sup>1,6,11</sup>, and Krishna K. Niyogi<sup>1,2,11\*</sup>

<sup>1</sup>Howard Hughes Medical Institute, University of California, Berkeley, CA 94720

<sup>2</sup>Department of Plant and Microbial Biology, University of California, Berkeley, CA 94720-3102

<sup>3</sup>Department of Bioengineering, University of California, Berkeley, CA 94720

<sup>4</sup>MSU-DOE Plant Research Laboratory and Department of Biochemistry and Molecular Biology, Michigan State University, East Lansing, MI 48824

<sup>5</sup>Electron Microscope Lab, University of California, Berkeley, CA 94720

<sup>6</sup>Department of Molecular and Cell Biology, University of California, Berkeley, CA 94720

<sup>7</sup>Janelia Research Campus, Howard Hughes Medical Institute, Ashburn, VA.

<sup>8</sup>UC Berkeley/UC San Francisco Graduate Group in Bioengineering, Berkeley, CA 94720

<sup>9</sup>Division of Biological Systems and Engineering, Lawrence Berkeley National Laboratory, Berkeley, CA 94720

<sup>10</sup>Chan Zuckerberg Biohub, San Francisco, CA 94158

<sup>11</sup>Molecular Biophysics and Integrated Bioimaging Division, Lawrence Berkeley National Laboratory, Berkeley, CA 94720

§Present address: Molecular, Cellular and Developmental Biology, University of Colorado at Boulder, Boulder, CO 80309.

\*To whom correspondence may be addressed: Email: [Jggarcia.cerdan@gmail.com](mailto:Jggarcia.cerdan@gmail.com) and [niyogi@berkeley.edu](mailto:niyogi@berkeley.edu)

**This PDF file includes:**

Supplementary text  
Figures S1 to S6  
Table S1  
SI References  
Legends for Movies S1 to S2  
Datasets S1 to S3

**Other supplementary materials for this manuscript include the following:**

Movies S1 to S2

## Supplementary Materials and Methods

**Chemical reagents.** HEPES (4-(2-hydroxyethyl)-1-piperazineethanesulfonic acid), DTT (Dithiothreitol), NaCl (Sodium chloride) and sucrose, were purchased from ThermoFisher Scientific. Atto 390-DOPE was purchased from ATTO-TEC. DOPC (1,2-dioleoyl-sn-glycero-3-phosphocholine), and POPA (1-palmitoyl-2-oleoyl-sn-glycero-3-phosphate) were purchased from Avanti Polar Lipids (Alabaster, AL). All purchased chemical reagents were used without further purification.

**Lipid analysis.** Lipid abbreviations are: MGDG, Monogalactosyldiacylglycerol; DGDG, Digalactosyldiacylglycerol; DGTS, Diacylglyceryltrimethylhomoserine; PE, Phosphatidylethanolamine; PG, Phosphatidylglycerol; SQDG, Sulfoquinovosyldiacylglycerol; PI, Phosphatidylinositol; PA, Phosphatidic acid. For each biological replicate, 100 ml of cultures were grown in TAP liquid medium to an OD<sub>750</sub> of ~0.4 in the dark at 24°C. For both constant dark and light treated (100 μmol photons m<sup>-2</sup> s<sup>-1</sup>) samples, total lipids were extracted from 7 X 10<sup>8</sup> cells in methanol: chloroform: 88% formic acid (2: 1: 0.1, v/v/v), and the separation of the organic phase was achieved by the addition of 0.5 volume of extraction buffer (1M KCl; 0.2M H<sub>3</sub>PO<sub>4</sub>) followed by centrifugation. The organic phase was dried to completion under nitrogen gas, resuspended in 125 μl of chloroform, and 25 μl of lipid extracts were separated by thin layer chromatography (TLC) on Silica Gel 60 plates (EMD chemicals) using the following solvent systems: for MGDG and DGTS, chloroform: acetone: methanol: acetic acid: water (80: 32: 16: 3: 3, v/v) ; for PE, PG, DGDG, SQDG and PI, chloroform, methanol, acetic acid: water (75:13:9:3, v/v); for PA, chloroform: methanol: ammonium hydroxide (65: 25: 5, v/v); and for neutral lipids, petroleum ether: diethyl ether: acetic acid (80: 20: 1, v/v). For the separation of PA, TLC plates were pretreated with ammonium sulfate(1). The identity of individual lipid was confirmed based on the separation of known lipid standards and the use of dyes specific to the lipid head group. Following the visualization of lipids by brief iodine staining, fatty acid methyl esters (FAMES) of each lipid as well as total cellular lipids were prepared in 1 M methanolic HCl by heating the samples at 80°C for 20 min. 5 μg pentadecanoic acid was used as an internal standard. Following the phase separation with hexane and 0.9 % (w/v) NaCl, the organic phase containing FAMES was completely dried under nitrogen gas, resuspended in 60 μl of hexane, and quantified by gas chromatography with flame ionization detection (Agilent Technologies, 7890A GC system) using a temperature and run profile previously described in (2) with minor modifications.

**Phylogenetic tree construction.** CRAL-TRIO domain containing proteins were retrieve by BLAST search (blastp) against the reference protein yeast phosphatidylinositol transfer protein (Sec14p) (3). Retrieved sequences were curated manually against Arabidopsis and Chlamydomonas genome annotations (Phytozome v12). CRAL-TRIO and GOLD protein domains were annotated by scanprosite tool (prosite.expasy.org). A maximum likelihood phylogenetic analysis

was performed following the server [http://phylogeny.lirmm.fr/phylo\\_cgi/index.cgi](http://phylogeny.lirmm.fr/phylo_cgi/index.cgi) mode "a la carte" (4). Fig Tree v1.4.2 was used to view the phylogenetic tree. CPSFL1 secondary structure prediction were analyzed with I-TASSER (5) . I-TASSER compares its protein structure simulation to all structures in the Protein Database Bank (PDB) library, by using a TM-align algorithm for sequence-order independent protein structure comparisons. The C-score is a confidence score for estimating the quality of predicted models ranging from low confidence (-5) to high confidence (+2). Image renders were performed with UCSF Chimera (6).

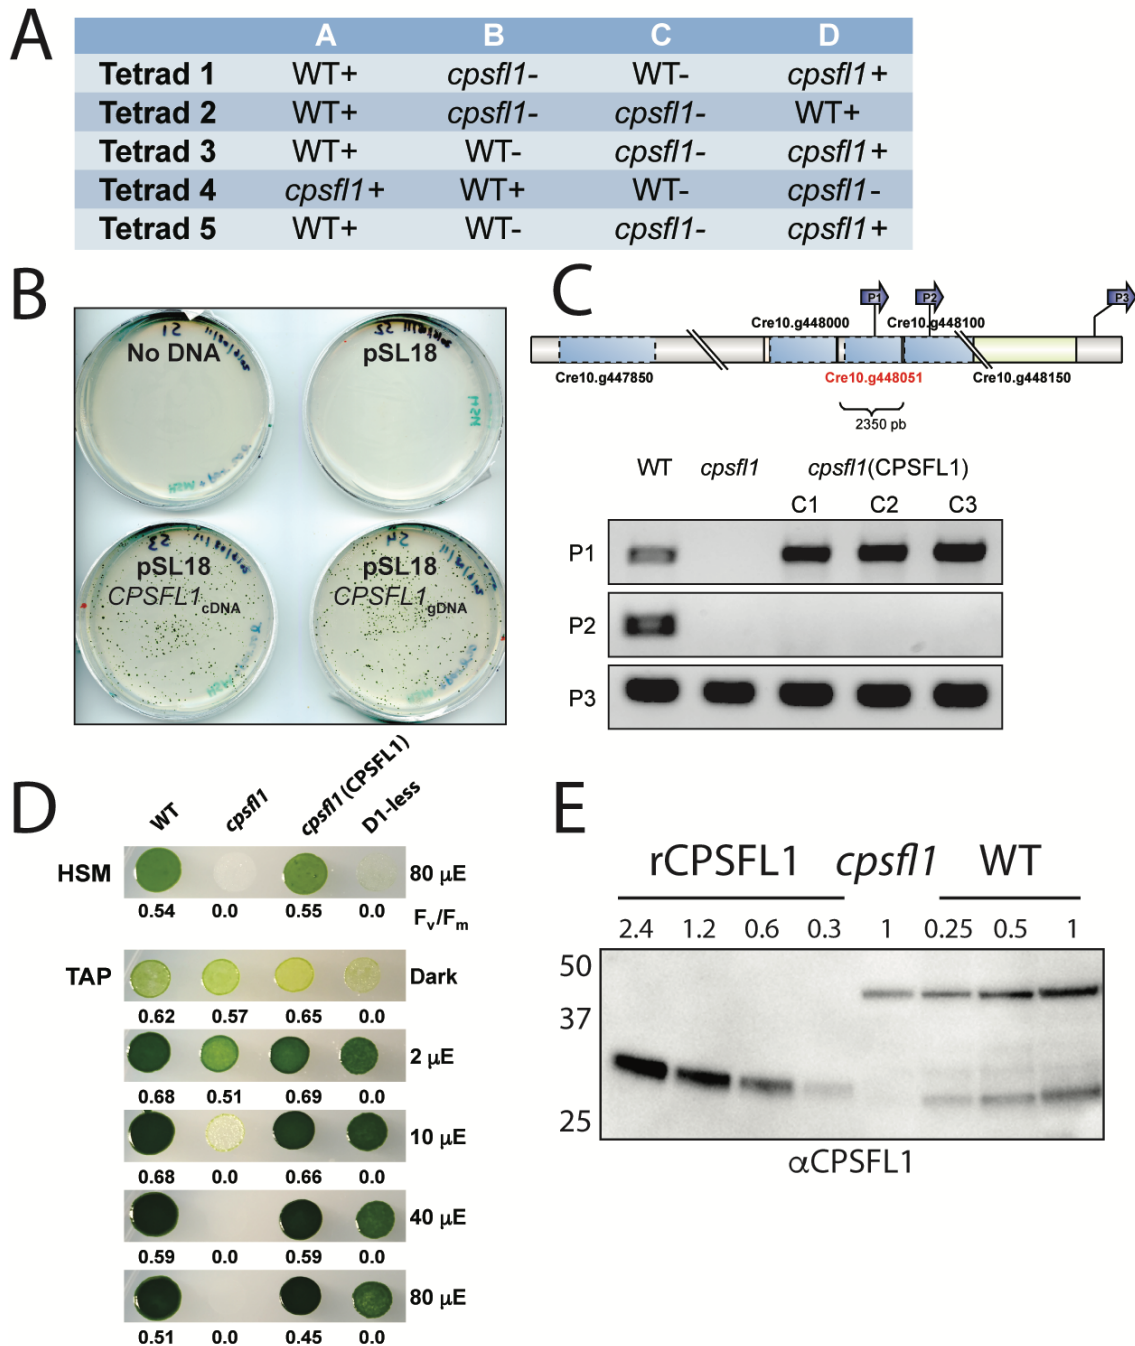

**Fig. S1. Genetic analysis and complementation of *cpsfl1*.** (A) Summary of tetrad analysis from a backcross of the mutant (mating type +) to the WT (mating type -), showing mating type (+/-) and *cpsfl1* phenotypes of five tetrads progeny. A-D are the four progeny of a selected tetrad. (B) Complementation of *cpsfl1* mutant was performed with either *CPSFL1* cDNA or genomic DNA (gDNA) under the control of *PSAD* promoter. pSL18 is the empty vector control. (C) Schematic representation of the location of primers P1, P2, and P3 within chromosome 10, and PCR analyses from WT, *cpsfl1*, and three complemented lines. (D) Growth

phenotypes of WT, *cpsfl1*, *cpsfl1*(CPSFL1), and D1-less (*fud7* mutant) cells spotted onto minimal (HSM) and TAP solid agar media, grown under different light irradiances, as indicated. PSII activity was assessed by measuring PSII maximum quantum efficiency ( $F_v/F_m$ ). The term  $\mu\text{E}$  represents  $\mu\text{mol photons m}^{-2} \text{ s}^{-1}$ . (E) CPSFL1 protein quantification from WT and *cpsfl1* mutant dark-grown whole cells. Loading of recombinant purified CPSFL1 protein dilutions are indicated in ng and whole cells loading of 1 corresponds to  $\sim 1 \times 10^6$  cells.

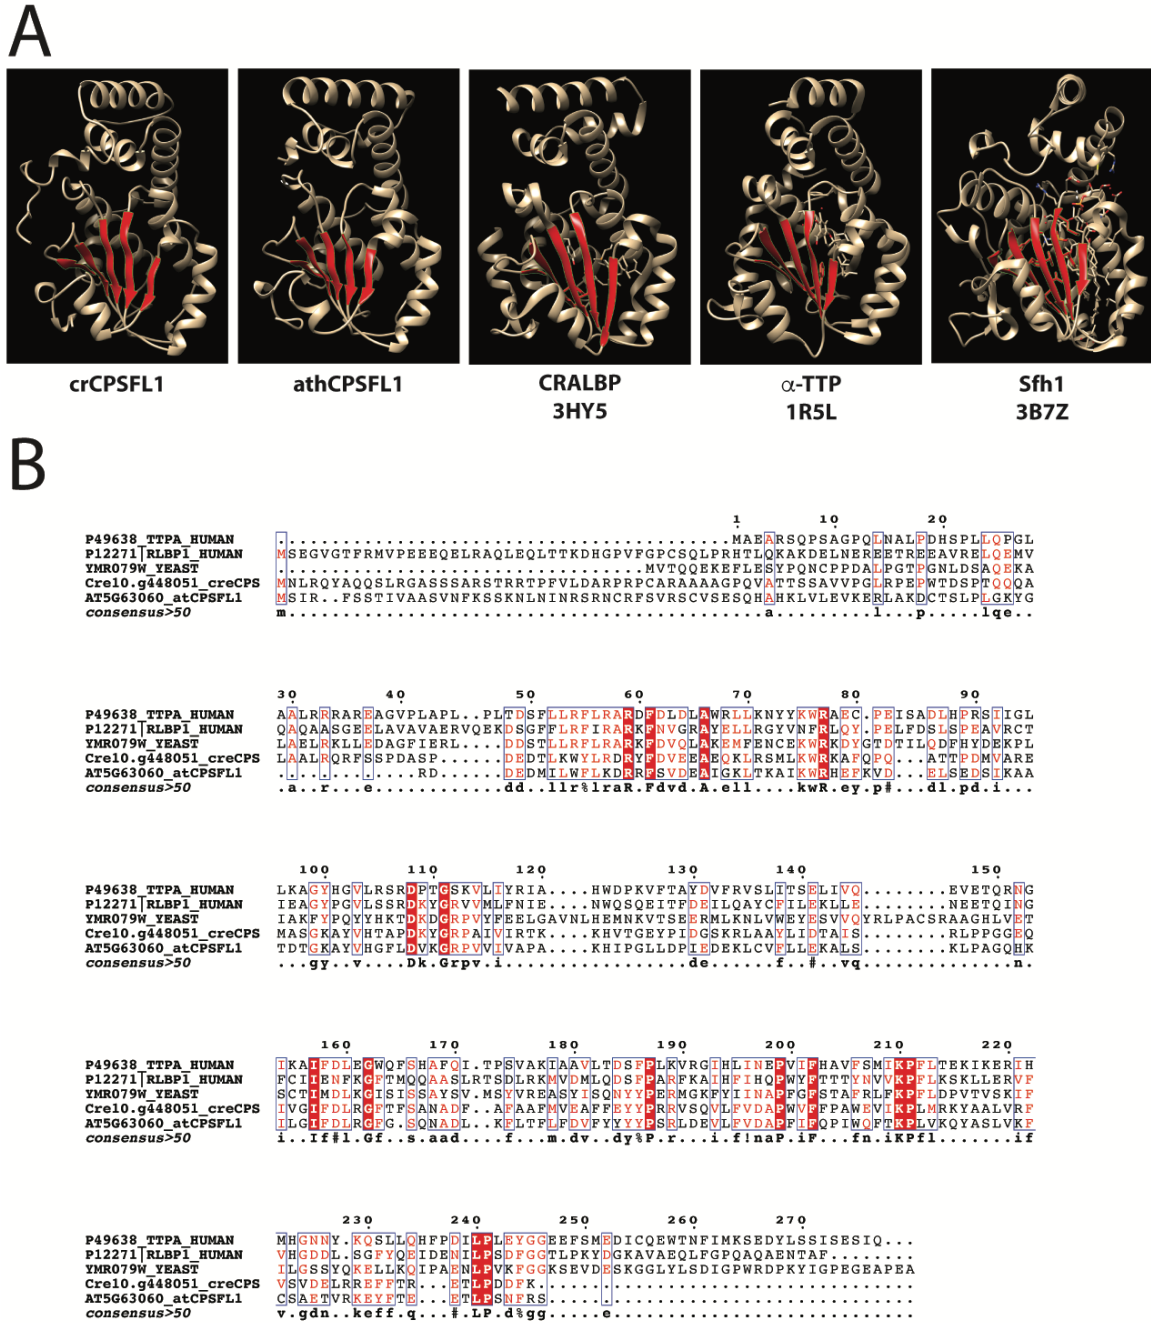

**Fig. S2. CRAL-TRIO domain proteins exhibit conserved predicted protein structure.** (A) Predicted protein structures of Arabidopsis and Chlamydomonas CPSFL1 and protein crystal structures of human cellular retinaldehyde-binding protein (CRALBP), human alpha-tocopherol transfer protein ( $\alpha$ -TTP), and yeast Sec14 homolog (Sfh1); PDB: 3HY5, 1R5L, and 3B7Z, respectively. The predicted  $\beta$ -sheets of the CRAL-TRIO domain are depicted in red. (B) Multiple protein sequence alignment between Arabidopsis CPSFL1, Chlamydomonas CPSFL1, human CRALBP, human  $\alpha$ -TTP, and yeast Sec14 homolog (Sfh1).

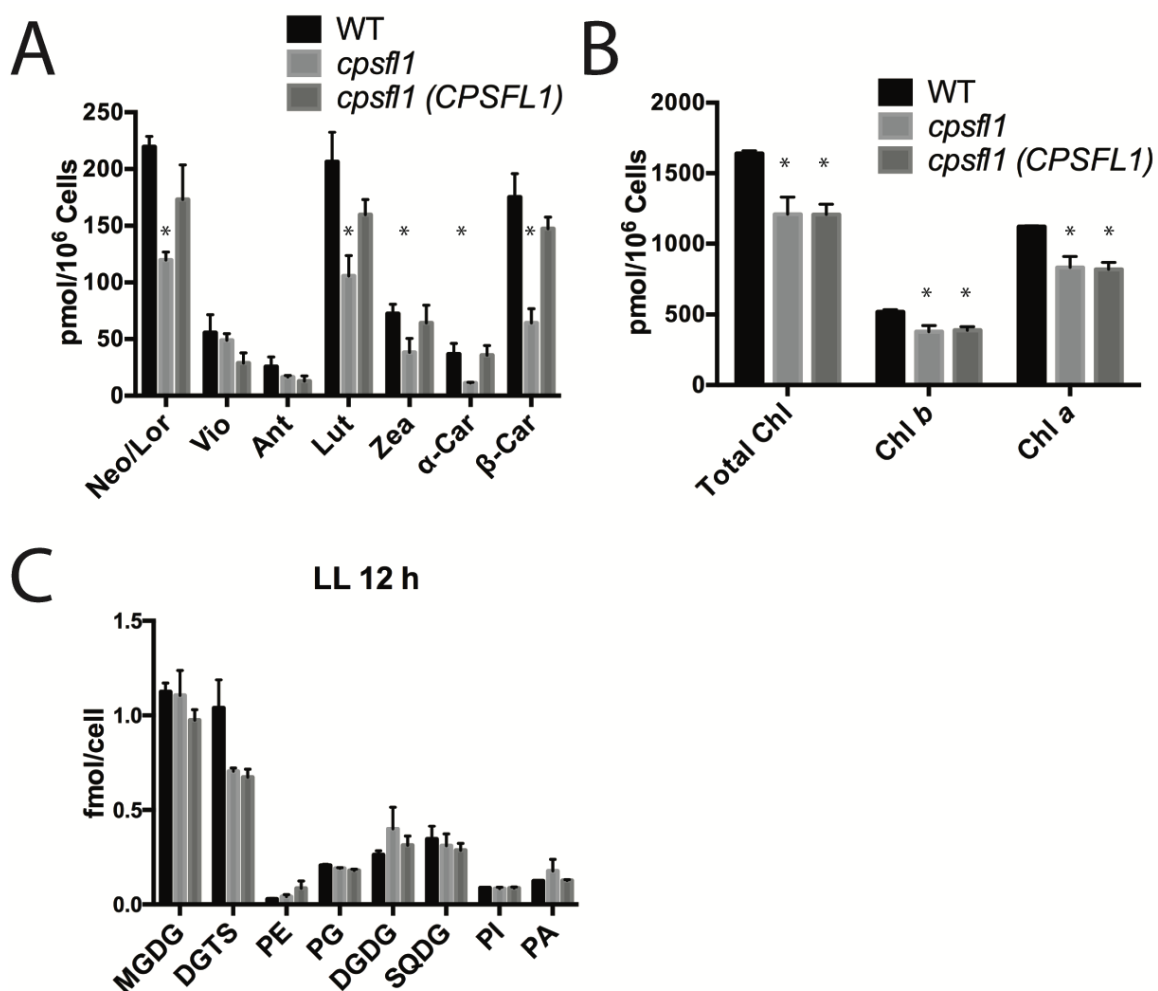

**Fig. S3. HPLC pigment analysis of WT, *cpsfl1*, and *cpsfl1*(CPSFL1) complemented cells.** (A) Carotenoids. (B) Chlorophylls. (C) Lipids. Cells for pigment analysis were treated with HL for 1 h. Cells for lipid analysis were grown in the dark and then shifted to low light for 12 h. Abbreviations for the different pigments are found in Methods. Data represent means  $\pm$  SD (n=3). Significantly changed pigments relative to the WT (two-tailed Student's t-test;  $P < 0.05$ ) are marked with asterisks.

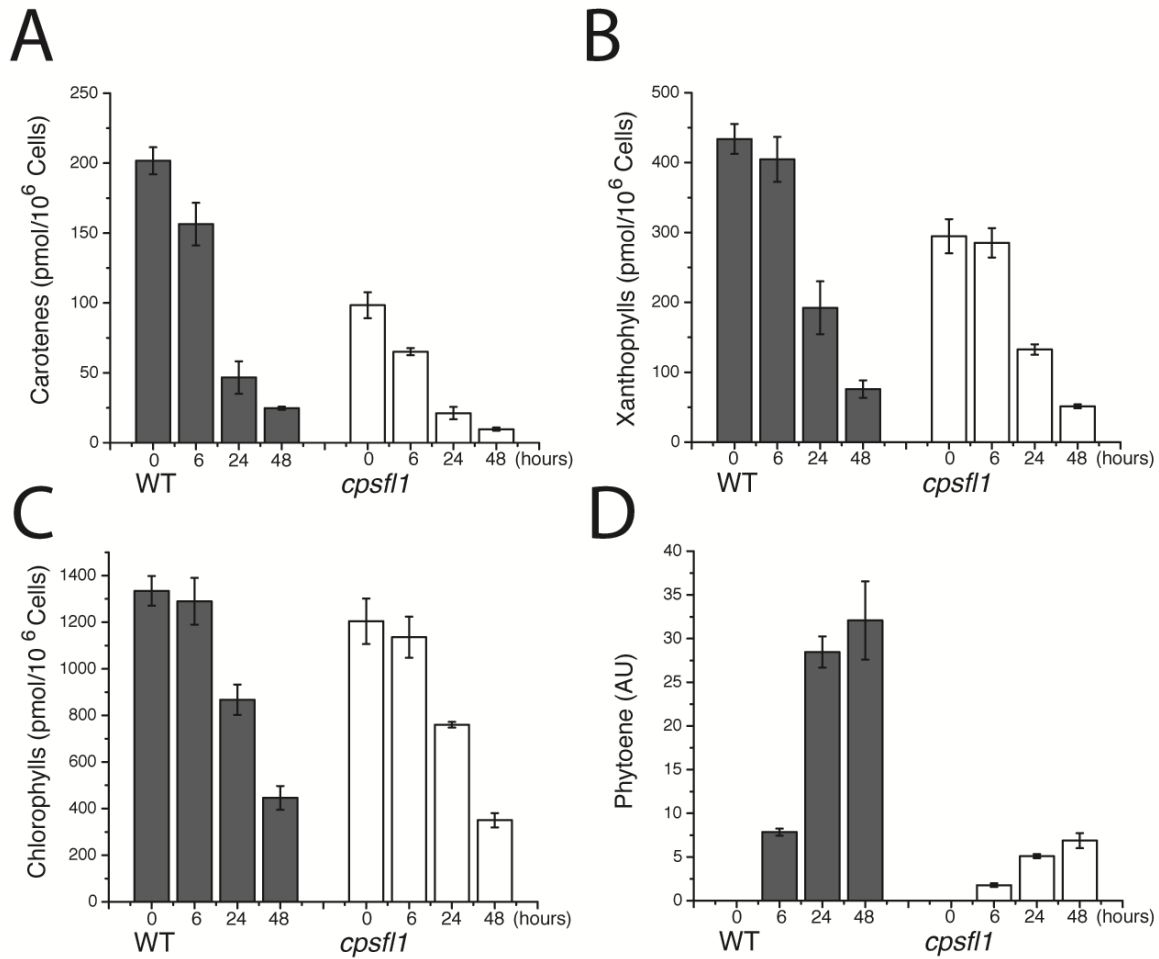

**Fig. S4. HPLC pigment analysis of dark-grown WT and *cpsfl1* mutant cells treated with the herbicide norflurazon for 48 h. (A) Carotenes. (B) Xanthophylls. (C) Chlorophylls. (D) Phytoene. Data represent means  $\pm$  SD (n=2).**



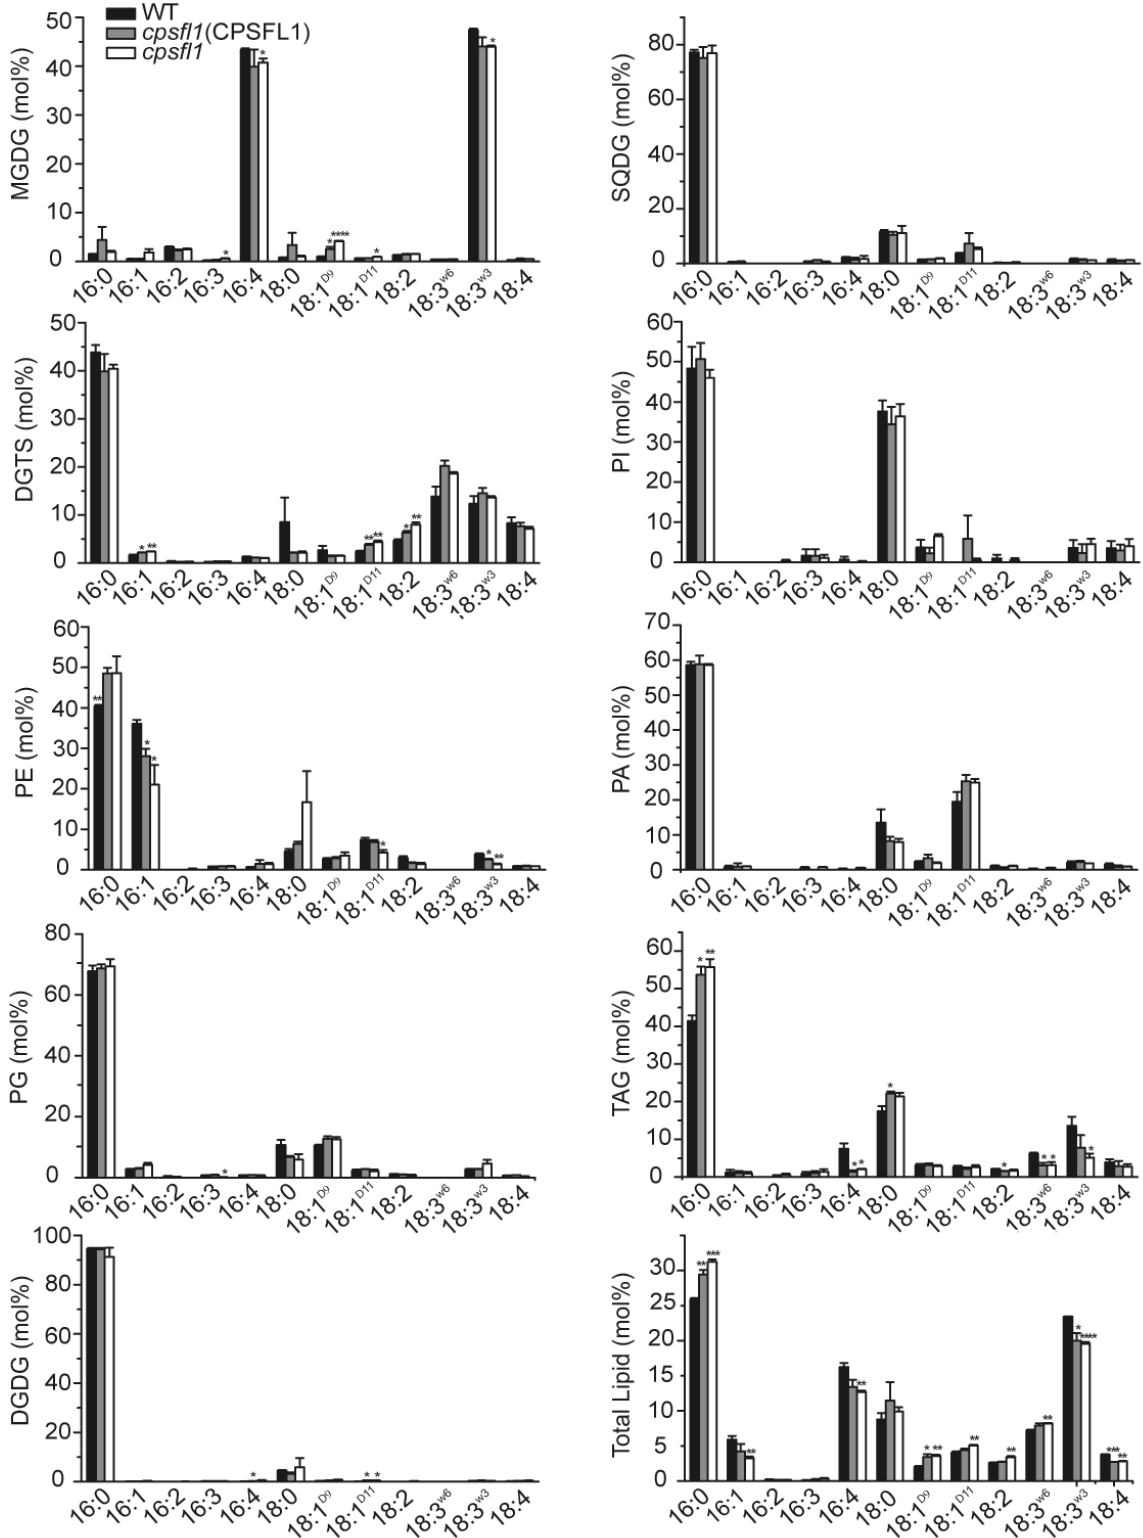

**Fig. S5. Acyl group compositions of different lipid species of dark-grown WT, *cpsfl1*, and *cpsfl1*(CPSFL1) complemented line. Data represent means  $\pm$  SD (n=3).**

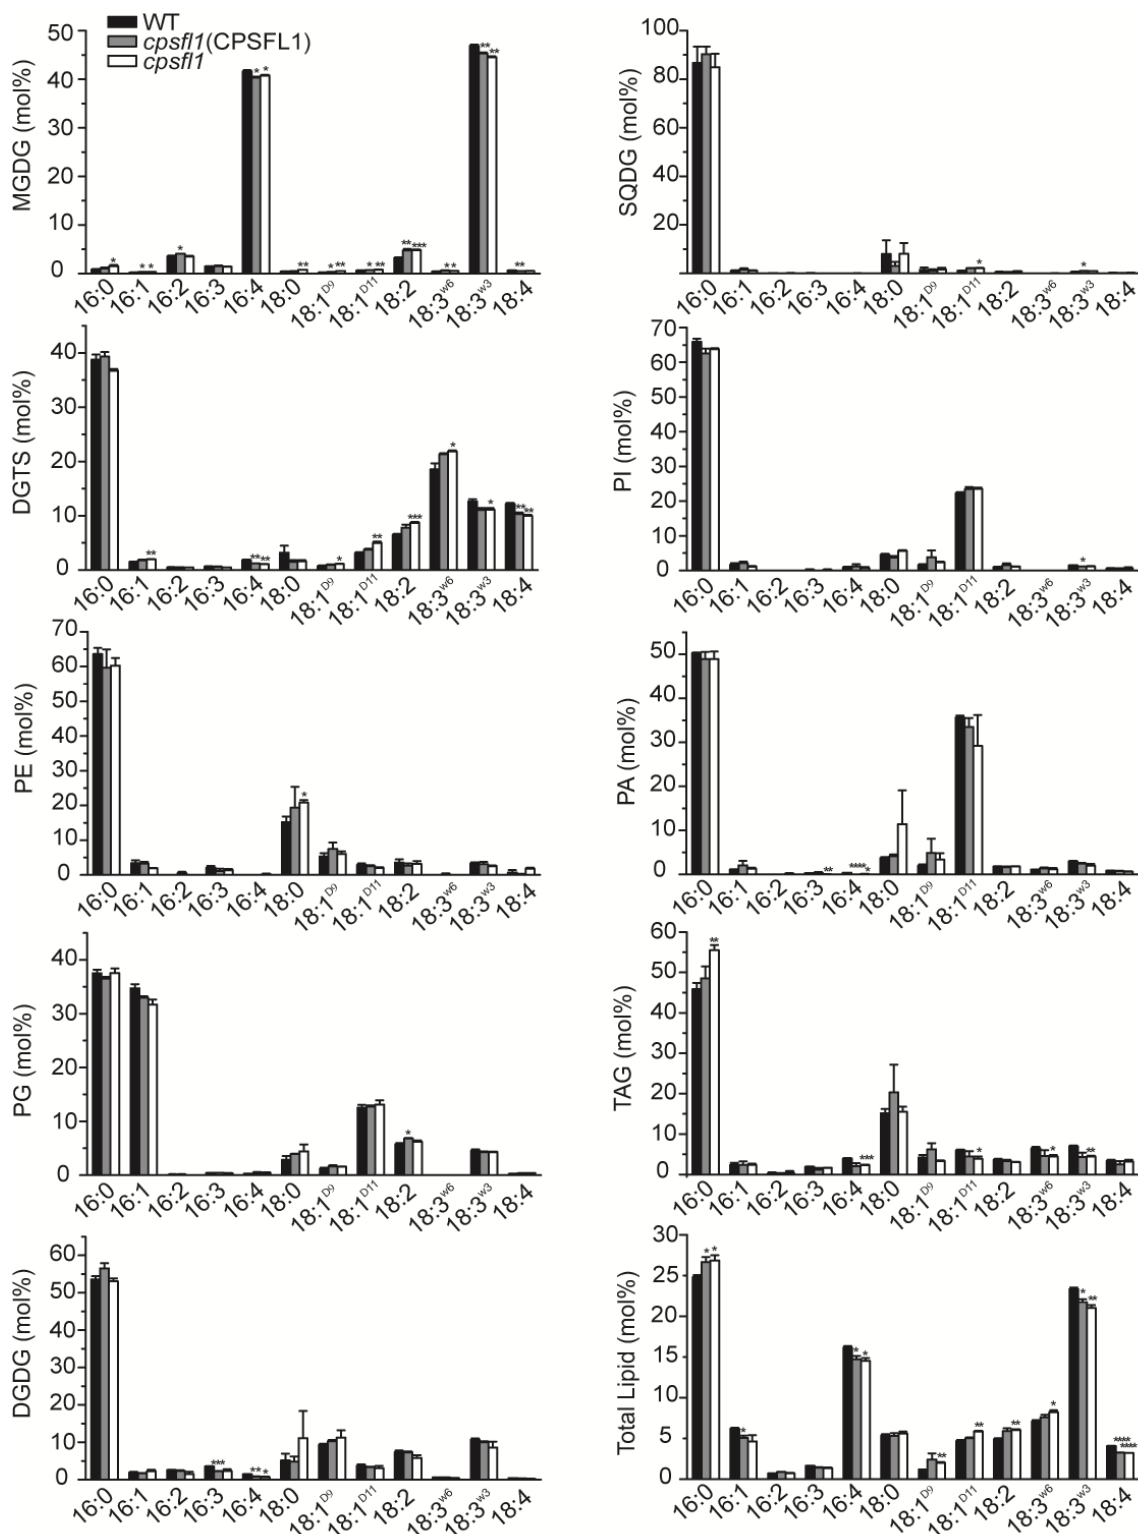

**Fig. S6. Acyl group compositions of different lipid species of WT, *cpsfl1*, and *cpsfl1*(CPSFL1) complemented line grown in the dark and then shifted to low light for 12 h. Data represent means  $\pm$  SD (n=3).**

**Table 1.** Oligonucleotides used in this study.

| <b>Primers name</b> | <b>Use of Primer</b>         | <b>Orientation</b> | <b>Sequence 5'- 3'</b>                                  |
|---------------------|------------------------------|--------------------|---------------------------------------------------------|
| gDNA CPSFL1 F       | genomic DNA cloning          | Forward            | CGCTAATGAGATGGACGTGA                                    |
| gDNA CPSFL1 R       | genomic DNA cloning          | Reverse            | AATTTACGTGCCCTGTTCCA                                    |
| cDNA_CPSFL1 F       | cDNA cloning                 | Forward            | TCACCGAACTCATCGCAATG                                    |
| cDNA_CPSFL1 R       | cDNA cloning                 | Reverse            | AATTTACGTGCCCTGTTCCA                                    |
| CPSFL1g/cDNA F      | gDNA/cDNA cloning into pSL19 | Forward            | ACAGAATTC AATAGCGCTCGTTCAGCATT                          |
| CPSFL1g/cDNA R FLAG | gDNA/cDNA cloning into pSL19 | Reverse            | ACAGGATCCTCACTTGTCGTCATCGTCTTGTAGTCCTTGAAGTCGTCAGGCAGAG |
| oeCPSFL1 F          | pET28(a+) cloning            | Forward            | GGAATTCATATGGCTGTGCTGCCGGCCGCAG                         |
| oeCPSFL1 R FLAG     | pET28(a+) cloning            | Reverse            | ACAGGATCCTCACTTGTCGTCATCGTCTTGTAGTCCTTGAAGTCGTCAGGCAGAG |
| oeGFP_F             | pET28(a+) GFP                | Forward            | AGCCATATGGCCAAGGGCGAGGAGCTGTT                           |
| oeGFP_R             | pET28(a+) GFP                | Reverse            | ACAGGATCCTTACTTGTACAGCTCGTCCA                           |
| P1F                 | Genotyping                   | Forward            | ATTGTTGGCATCTTCGACCT                                    |
| P1R                 | Genotyping                   | Reverse            | AACTCTCTCCGACGCTCATC                                    |
| P2F                 | Genotyping                   | Forward            | CTTTCGCTTCGTGTTTGTGA                                    |
| P2R                 | Genotyping                   | Reverse            | ACCCTTGCTGGTTGCAATAC                                    |
| P3F                 | Genotyping                   | Forward            | CAGCTGACATTGCCGACTT                                     |
| P3R                 | Genotyping                   | Reverse            | CAGGTAGCGTTGCTTGAGTG                                    |
| (MT+)F              | Mating type                  | Forward            | GATTGCTCTGTCGTTGCAGA                                    |
| (MT+)R              | Mating type                  | Reverse            | CCGCACATGAGACGTTACAG                                    |
| (MT-)F              | Mating type                  | Forward            | GCCACGAAGGCAGTTACATT                                    |
| (MT-)R              | Mating type                  | Reverse            | TGGCGTACCTTCTGTAGGG                                     |

## SI References

1. Benning C & Somerville CR (1992) Isolation and genetic complementation of a sulfolipid-deficient mutant of *Rhodobacter sphaeroides*. *J Bacteriol* 174(7):2352-2360.
2. Zauner S, Jochum W, Bigorowski T, & Benning C (2012) A cytochrome b5-containing plastid-located fatty acid desaturase from *Chlamydomonas reinhardtii*. *Eukaryot Cell* 11(7):856-863.
3. Sha B, Phillips SE, Bankaitis VA, & Luo M (1998) Crystal structure of the *Saccharomyces cerevisiae* phosphatidylinositol-transfer protein. *Nature* 391(6666):506-510.
4. Dereeper A, *et al.* (2008) Phylogeny.fr: robust phylogenetic analysis for the non-specialist. *Nucleic Acids Res* 36(Web Server issue):W465-469.
5. Yang J, *et al.* (2015) The I-TASSER Suite: protein structure and function prediction. *Nat Methods* 12(1):7-8.
6. Pettersen EF, *et al.* (2004) UCSF Chimera--a visualization system for exploratory research and analysis. *J Comput Chem* 25(13):1605-1612.

**Movie S1.** FIB-SEM 3D reconstruction video of WT cell.

**Movie S2.** FIB-SEM 3D reconstruction video of *cpsfl1* mutant cell.

**Dataset S1.** Flanking DNA insertion sequence.

>CAL028\_01\_06

```
AAGGAACCGCCTGGCGGCTCTGCAGCAGCACAGCACCGCGGCTATGACGAGCCAGGAGT
GGCAGAGGCGTCTGGCGCCGTGGCCGCTGGAGGACAGCATGTTCAACCCCGTGGGGGCG
CCGTAATAGCAGCAGATGGTGCCGGCCAACATGGCGCAG
```

**Dataset S2.** *CPSFL1* Genomic DNA, CDS and *CPSFL1* protein sequences.

Genomic *CPSFL1* DNA sequence. The blue uppercase letters represent UTR regions, the red uppercase letters represent exons, and the black uppercase letters represents introns.

```
CGCCAGAGCGCTCGCGCTGCGCAGGCTTACACGTAATGTCATTGCTACTT
CATTGCTATCCTTCGCATATGTATCGCTTGAACAAATAACAATCTATGTTAGT
TAGCGGCGCTCAGCAGCGATGGCCATCGGAAAAACACAATCGCCCATGTAA
CTGAGAACTTGAAGCTTACAAACGCTTATCATGATTATTGCAGTTATAATAGA
CTTACATACATTTATCACTTGTTTCTCTGGGCTGGGGGTGGGCGAGGTAGC
GGCAAGCACGTCGTTGTCACCGAACTCATCGCAATGAACTTGAGACAGTAC
GCGCAGCAGAGCTTGCGGGGAGCTAGCTCCTCTGCGCGTTCTACAAGGCG
CACGCCGTTTGTGCTTGATGCGCGACCGCGGCCATGCGCTCGTGCTGCTG
CTGCCGGGCCGAGGTTGCGACAACGAGCTCGGCCGTGGTCCCAGGACT
GCGCCCTGAGCCATGGACGGACTCGCCGACTCAGCAGCAGGTGCGACGC
GTGTGGCTATTTGGTCGTGCCTGCCACAATGGTGATTCCCCAAAGGTGCGGA
TGGCCACCAGTTTACCTGGCCCGGGCTCACACGCACTTTCCCCAGGCGCTT
GCGGCCTTGAGACAACGTTTCAGCTCCCCCGATGCCTCCCCGATGAAGA
CACGCTCAAGTGGTACCTGCGGGACCGTTACTTCGATGTGGAGGAGGCAG
AGCAGAAGCTACGCAGCATGCTCAAGTGGCGCAAGGCGTTCCAGTGAGCA
GCTGCTGGGCGGGCGTGGGGCCACGTTGGGCGCAGTCGCAGGGTTGGTT
CACGGCTTCATCAGCGGCCGCGGCACATTATGGATGAAGGGTCTGGACTT
GCCTCATGCAGGATGAGGCATCCCGGCATGCGCAGGGGGTTACAGGGGAG
GCCACAACCGGCCGCGTACACACACGTTTGGCACACAGCCCATTTGTGCCT
TGCATACGGGAGTTCCCAGTACGCGCCACGCGCACCGCTGACCACGAGTC
TCGGCTGTGCCAGTATGGCTGTACACCACACCATCGGCTGTTTCGCTGAGA
TATGCAACACCACCACACCTCGCGCCACACCCCCAGGCCCCAGGCCACCA
CCCCGGACATGGTGGCCCGCGAGATGGCCAGCGGCAAAGCCTACGTGCAC
ACCGCACCCGACAAGTATGGCAGGCCCGCCATCGTGATCCGCACCAAGAA
GCACGTGACCGGTAAGTGATGGGGTGGGTGATGGGACATTGTGCCTGTGT
TCATGGCCTAGCCGAAGCTGTGCGGGACGCCGTGTAATGCATTGCCATCAT
GCGCGGTTGTGATTGGCTGCCATGCCTTTCCCCCGCGGTGACATGCAACCC
GTTTACACTACCTGATACCTCCCAGGCGAGTACCCTATCGACGGCTCCAAG
CGCCTGGCGGCGTACCTGATTGACACCGCCATCTCGCGCCTGCCCCGGG
CGGCGAGCAGATTGTTGGCATCTTCGACCTGCGCGGCTTCACATTCTCCGC
CAATGCGGACTTCGCGTTCGCGGCCTTCATGTACGTGCGGCTGCGGAGC
```

TGCAGCGCTGGGTTCCGGGTCATGGACTCATGCAGTGGATTTGTGGCGCTG  
CAGTGATCAAACCTCTGCACCAGTCCCATGGGACCTGCTGGGGCTGCTCA  
ACGTCCTATCCGCAGGCTCTCAGTCTACTGCAAGGCGCACCTACTCCAAGC  
ACCCCTTCTCTCCTAAGTGCAAAAACGTTGACTTTGGTGGCGCAGGTGGAG  
GCGTTCTTTGAGTACTATCCCCGCCGCGTGAGCCAGGTGCTGTTTGTGGAC  
GCGCCCTGGGTATTCTTCCCCGCATGGGAGGTCATCAAGCCGCTCATGCG  
CAAGTACGCTGCTCTGTGAGTCTTTCTGTTTGCAGTGCTGGCTGCGCGTG  
GTACGACGAAATGCCTAGGTGTGATATGTTGGTGTGCTGCTCCCTGTGT  
GACGTTTCGTGTGGCTGGGACGGATTCTAGCGACGCCACGGTTGGCGCTTG  
TGGAGACATCAGATACTGGGCCACCCGTTACCGGGTACAAGTGCGCTTGCA  
TGCCTGACATGCCGACCGTGCAATCCACAGGTGCGCTTCGTGAGCGTGGAT  
GAGCTGCGGAGAGAGTTCTTCACTCGCGAGACTCTGCCTGACGACTTCAAG  
TGATCGTATTTGTTCCGACTGCAGGGCCGCTGTGACTACGATAAACCTGTG  
GGCATTGTGTGCGGTGTGTTGTAAGGGGGATGCAGAGAGGGTGTGAGGA  
GGCGCTGTGGACTGGTCAGGGCGGGGGCCGAAGACACGGAGGGGCCCTTC  
CTTGAACAGGGCACGTAAATTTTGTATTTTTACATCAACGGCAAGCCTGA  
TATTTTATGTGCGCCAAACGCGCCACATGTTTTCGAGGAAATGGCGACGAG  
GAATGAAGGCACGCAGGGATCGCGTTGACTACAAACAATCCATGTACTTAA  
TATGTATGGCAGTAGAATTGTAAGATGAAGGAGC

*CPSFL1* CDS:

ATGAACTTGAGACAGTACGCGCAGCAGAGCTTGCGGGGAGCTAGCTCCTCT  
GCGCGTTCTACAAGGCGCACGCCGTTTGTGCTTGATGCGCGACCGCGGCC  
ATGCGCTCGTGCTGCTGCTGCCGGGCCGAGGTTGCGACAACGAGCTCGG  
CCGTGGTCCCAGGACTGCGCCCTGAGCCATGGACGGACTCGCCGACTCAG  
CAGCAGGCGCTTGCGGCCTTGAGACAACGGTTCAGCTCCCCGATGCCTC  
CCCCGATGAAGACACGCTCAAGTGGTACCTGCGGGACCGTTACTTCGATGT  
GGAGGAGGCAGAGCAGAAGCTACGCAGCATGCTCAAGTGGCGCAAGGCGT  
TCCAGCCCCAGGCCACCACCCCGGACATGGTGGCCCGCGAGATGGCCAG  
CGGCAAAGCCTACGTGCACACCGCACCCGACAAGTATGGCAGGCCCGCCA  
TCGTGATCCGCACCAAGAAGCACGTGACCGGCGAGTACCCTATCGACGGC  
TCCAAGCGCCTGGCGGGCGTACCTGATTGACACCGCCATCTCGCGCCTGCC  
CCCGGGCGGCGAGCAGATTGTTGGCATCTTCGACCTGCGCGGCTTCACATT  
CTCCGCCAATGCGGACTTCGCGTTTCGCGGCCTTCATGGTGGAGGCGTTCTT  
TGAGTACTATCCCCGCCGCGTGAGCCAGGTGCTGTTTGTGGACGCGCCCT  
GGGTATTCTTCCCCGCATGGGAGGTCATCAAGCCGCTCATGCGCAAGTACG  
CTGCTCTGGTGGCCTTCGTGAGCGTGGATGAGCTGCGGAGAGAGTTCTTCA  
CTCGCGAGACTCTGCCTGACGACTTCAAGTGA

*CPSFL1* protein sequence:

MNLRQYAQQSLRGASSSARSTRRTPFVLDARPRPCARAAAAGPQVATTSSAV  
VPGLRPEPWTDSPQQQALAALRQRFSSPDASPEDTLKWYLRDRYFDVEEA  
EQKLRSMLKWRKAFQPQATTPDMVAREMASGKAYVHTAPDKYGRPAIVIRTKK  
HVTGEYPIDGSKRLAAYLIDTAISRLPPGGEQIVGIFDLRGFTFSANADF AFAAFM  
VEAFFEYPRRVSQVLFVDAPWVFFPAWEVIKPLMRKYAALVRFVSVDELRE  
FFTRETLPDDFK

**Dataset S3.** Protein sequences and accession numbers.

>P49638\_TTPA\_HUMAN Alpha-tocopherol transfer protein  
MAEARSQPSAGPQLNALPDHSPLLQPGLAALRRRAREAGVPLAPLPLTDSFLL  
RFLRARDFDLAWRLLKNYYKWRAECPEISADLHPRSIIIGLLKAGYHGVLSR  
DPTGSKVLIYRIAHWDPKVFTAYDVFRVSLITSELIVQEVEVETQRNGIKAIFDLEGW  
QFSHAFQITPSVAKIAAVLTDSFPLKVRGIHLINPEVIFHAVFSMIKPFLTEKIKERI  
HMHGNNYKQSLQHFDPDILPLEYGGEEFSMEDICQEWTFIMKSELYLSSISESI  
Q

>P12271|RLBP1\_HUMAN Retinaldehyde-binding protein 1 OS=Homo sapiens  
OX=9606 GN=RLBP1 PE=1 SV=2  
MSEGVGTFRMVPEEEQELRAQLEQLTTKDHGPVFGPCSQLPRHTLQKAKDEL  
NEREETREEAVRELQEMVQAQAASGEELAVAVAERVQEKDSGFFLRFIRARKF  
NVGRAYELLRGYVNFRLQYPELFDLSPEAVRCTIEAGYPGVLSSRDKYGRVV  
MLFNIENWQSQEITFDEILQAYCFILEKLLENEETQINGFCIIENFKGFTMQQAAS  
LRTSDLRKMVDMLQDSFPARFKAIHFHQPWYFTTTYNVVKPFLKSKLLERVFV  
HGDDLSGFYQEIDENILPSDFGGTLPKYDGKAVAEQLFGPQAQAENTAF

>YMR079W\_YEAST  
MVTQQEKEFLESYPQNCPPDALPGTPGNLDSAQEKALAE LRKLE DAGFIERLD  
DSTLLRFLRARKFDVQLAKEMFENCEKWRKDYGTDITLQDFHYDEKPLIAKFYP  
QYYHKTDKGRPVYFEELGAVNLHEMNKVTSEERMLKNL VWEYESVVQYRLP  
ACSRAAGHLVETSCTIMDLKGISISSAYSVM SYVREASYISQNYPERMGKFYII  
NAPFGFSTAFRLFKPFLDPVTVSKIFILGSSYQKELLKQIPAENLPVKFGGKSEVD  
ESKGGLYLSDIGPWRDPKYIGPEGEAPEA

>XP\_001698482.1 (Cre10.g448051)  
MNLRQYAQQSLRGASSARSTRRTPFVLDARPRPCARAAAAGPQVATTSSAV  
VPGLRPEPWTDSPTQQQALAALRQRFSSPDASPEDTLKWYLRDRYFDVEEA  
EQKLRSMLKWRKAFQPQATTPDMVAREMASGKAYVHTAPDKYGRPAIVIRTKK  
HVTGEYPIDGSKRLAAYLIDTAISRLLPPGGEQIVGIFDLRGFTFSANADF AFAAFM  
VEAFFEYPRRVSQVLFVDAPWVFFPAWEVIKPLMRKYAALVRFVSVDELRE  
FFTRETLPDDFK

>XP\_001699411.1 (Cre03.g210961)  
MTFADVLT DHEKELVEQLKREVAPIVERHPCLQAF CIPHTYVRYLRARQWNLQK  
ASKMLKATLEWRLEYKPHLIKWDEVKDEGTTGKQYVYHCVDKAGRPTVLMRP  
RNQNTKETDRQIRHLIYTLAASRQADRLGVGKFTWLLDFEGYTMANAPPLKVS  
MHCNSVLNHYPERLGLAVCYHAPYLFSLTWKAVQPFIDPVTQKQIVFVDKGP  
EKDEMGARFDLTQMEQCMGGALPNYAYDHDKYGD RMHEYDKEVA AELDKLS  
GRMCAAHAADHHEQHEHAIQGIAEATEKLSVTVTAT

>XP\_001691915.1 (Cre16.g683400)

MNQVLATSRPSSEASDASVTDDAFSPQASSVLASASTTVSEASSDVTEEQIKYV  
RAHCDVCAASADDATVRRFIRATGGNLALSVKRLNATCAWRASVRPEQVVCR  
ACVRDPRSHYMHLCGYAADGRPIIYSLANPTNKVFEDNKAHMIQTFEWAIKC  
MPPGVEQWIWVCDKFGFGMADVNPKLAKLFLDISAEHYPERLGMFMIVDAPSL  
FGLLWKAIQSFVDPKTYKKIRFLPFDFKAGGGKGSLLKAEMEQHFDPVTTAWLL  
REMAENRDKAKVPLKPYNYYSLHQQVLSGELCSGGEHALCHHGHLALQLPTA  
HAHHQHQHHSAAHQHAHKSGSSSGADAAHAASVTADSSAAAAAAPSAPSPSPSD  
TNSTGSSSHCGGPYQPHVLAEEAGRLPHNYWGTPAFLHTLNARPELLLPQAIA  
TGTV

>XP\_001697046.1 (Cre12.g522100)

MSPHPPYVPNEHDVQLLKEHVLSVHPDAQQVLVDALEEGLTTKLLSRWLTARK  
GDVKAAMLEKHVAVRRGAGRPVDESHHGQVQVNLAKKVFLLQGLDKTGRPI  
VLGVGSRHRKFETKEDALAFCTYALDTACAIGNSHEEWDGKLTGVFDLRNLSL  
KNMDLTALQVMFELLQNHYPRLGRLFLYEAPVAFYALWRAVSPFVDPVTKTKI  
NFVYAKNAHDDFEKVFDLHLLPTDLGGQGDYHAIDEAHKRALERAAARAGSAS  
PSASPAASPAGANGNAANTAAPAAAAPGAAAAPGAPAAAAPAPAPAGPAAAAG  
AAVPTPTTPTASVSAAAAEVKAPHA AAAAQPA

>XP\_001690990.1 (Cre12.g503950)

MADARAVVAAAPPELLESVRKEIRGFGDVAEDVITEQCDDATIQRYLARNGNV  
HKAALLHGTLLWRKEFKDTLTIGEFDGRTLSSGRMYIAGNDTSGKSILVRVW  
LMDMRGYSRANSPPLGVSMATLRILADHFPERLHRCFFIDAPGIFSFLFNALWP  
FIDPVTRQKIVFINTKDYSKQIDAVNAAGSDGAAREALQEAAKPAEPDAFDNYL  
RWYCSQYDEAEYRKLAAVWGQ

>XP\_001701382.1 (Cre11.g467563)

MHHGSISWTPKAPPSVAMGTRDAEQADAGQGAVSAGEAGTASQPAQAHVTAR  
AGAEFSAPHAGTLAPPAGASGSSPDAASSAGAASNPAIAAVALGDGEEGR  
ALLQEFRDAFSLNDETFITAELLPRQAAALALRRRCGLVGKARWAPGQLHAS  
VTPQELALIEQMREQLETAQPPLTSPQDAAYVTDLMMLRYAMHMFHSLVWR  
RTHTPWAMSNPATATNKNSDARIVGYDTQGRVVYSSFARSVERTPEHVKLN  
TTCLMEKATLCVNAGSPGSVWVNHFGGRHKNFGWRDANPAFALGAIDVFS  
NHYPECLATMIIVDPPAVFFGLWKLHPLLPEKTAKKGDFIHSADNSAKFNALF  
GRELAAYITQLIQQDAHVSDPIHLP

>XP\_001703767.1 (Cre17.g718100)

MPLPLRVPPDADDHDLARFLKARNYDLQAAKQMWEGMISWRRENVDNIHEW  
FVHERSEYEKVFPTGLHKTDKEGHPVLIQQLGRVNIGALYKVTDDRIRMAHIA  
ENEQMRRTVFPACSYRAGRPVDKLFITIDLEGIAFTSVMRTTSILKMYMQMDSN  
NYPETLARMAIINAPGWSTSWSAIKGVLNGETVKKIEILGKDYQAALLRHIPRE  
NLLTQYGGTSAGSLTDNIGPWQEP

>XP\_001691585.1 (Cre17.g703200)

MHFFSHAPQPVQKEVEAFWYLNLSPEQQAHDKFLAHLTDTKQLLVGHDDRY  
TLLRFLKARQWDVNKATIMYTNMTKWRAEHGTDRLYETFTFPEEDQVIEHYPH



FYHMTDKFGRPLYIELLGHTDAAKILEHTSMERLMDYHIVEWERLKRILPRCSL  
LAGKPIITKNVILDLKGVSMKNFGHAAREILTKIAAIDQDYCESLGQMFINTPTV  
FRLIWAVVNPMLLEERTRRKIIILGSDYMPITITQLIPEDNLPACLGGKGARTDMKTT  
IGPWTEVELPAPGPAAMAAATAAAASPAKEPAAASPAKEPVVASPVKEPMVTV  
PADTVAVTVGNNGIIAAH

>XP\_001696988.1 (Cre12.g527050)

MPPQVKPLPGPPQKFQGRKDYPIENKTDDWGLTPEAQETYVEVFRQRLEALQL  
WKPEIDYFTLRRFLRARTYDFDRAIKMWTDHVNWRENKVDLSILQDFHFDERD  
KFLEAYPQGYHKLDKMGRPVIYIQLIGKIKVPAIMECTNEERMFKFHVQEYERCV  
KVIMPIASKLAGRKVDQTFGIMDVKGVGMSALTGDVCRMGLGQFTKTDQDNYPE  
MLGHICIIINAPAVFRMLWGLVKNMIDVRTQQKIEILGPNYMEALLKHMDIENIPEF  
LGGQSRGTLDDVGPWSDPELMAANGIDVDALRRGDPAGALPGPGLASPSFT  
RAPSLLNSSLGPMGSMFRTPTVARVSVEAANGASPSASASGPSAMLAASAAAT  
VAQLQAIENRSRSLQERVKVLNMLPAALERSRPQAATDVSVRSAPPEGSLLN  
RVEVLEDAVETVLLAQEALIIQAQQQAQLTEVALADLRNRVATAEAKASSAKAG  
CCTIM

>XP\_001694970.1 (Cre02.g141950)

MWGWGAGWGAATTATPSATAADNYTDKDAFWYLTPEEQKAALSCLRQTL  
AENLIVPDHDADITLLRFLMARDFNVDKALSMYRDMRAWRQSEGITGLYRDDP  
AGEQFPEMEALLEVYPHFTFNTDKFGRPVYVEMLGRTDAAKLFEVISVERLIRY  
HCWTWERYLRCYLPACSAAGRPICTTTVIIDLGLSLAHFNAATQRLNNTFSKI  
DQDYYPEHLGTMFIINTPLIFRGMWAAVQPLLQERTRKKIIMLGADYLPETKLV  
PAERLPDLLGGGGRMQRGYKSVGPWRSPDPAQQREEGPAEVQAQAEAGQQ  
DEDGARQGAQQLQEAPQVREGVVVSISTAGDLGAPEGEGGKGAATVEAAE  
AEVETSVGGKVGEVAVAAMAALTVQA

>XP\_001699808.1 (Cre02.g101200)

MATQANPSTVLESPYPARKDGYVGCLTATQEAALADMVEKFIDAVHASDLNGP  
DQMTLWGVQLADLAVSHRWDTAEESEQQQHESTSAPTATDSNGGAGNGAEA  
VNGRRAPAGGTRGSNGGASPRTPSKAQKVLLKFLRARQWNVAANMLV  
NCLRWRDFDVAGLGLTFPPQLAAAGQLTGHDRAGNPVTYNYGTGVDLNA  
VMGSPGGVATFVRWRVRLMEQAIAQLDFERGVHVTQIHDIYAGASMFMDAG  
IKSASREIIRLFQDNYPELLSAKLFLNVPRVMEFLFGVFSGLADAATRAKFTMAS  
PARAAVLFTYVDPVHVPARFGGFMETFVIPPKNKHAPPFSAARSKCLTLQPGE  
GHVTGDLAGAQAQAEVAWAFVSTGPPLNVTVSFRPQDNQEAATAARMPDHIQG  
SAVSGYGEEAYLTCSHDMTLTKEAASGRLVLGVPGEVTLTMDNICGKAGIFTGP  
PNATVHYALVSSAPARAAPGAGAGAPGSPTAAGAAGDAGSSAASNALFEAP  
GRLRFMDRSRSMFSYKSGFCASLTSEDVGLNEVGSMPSPTGQRAAQLAGG  
PSRGHFEAVPEADDEAGASSRQASVAGTTPRSTAGGAEQAAK

>XP\_001690497.1 (Cre10.g444250)

MFARFRHDKAAAPQGPPHNGHHGAGAKAGLNAPSDSLTQPPLRFAGRRDYDI  
EPGADEWGLTPNQQAQAVESFRRQLVDIDPRLWDPQRHDFFTLRRFLRARSY  
HTARAVDMWRAHLEWRQANDVDRVLQDFSPPERGEFLRHAPQGYHTDRQV

GRPVYVQLLGSADLGALRRRIATEERMFRFMVHEHEYVCKVILPLCSRLAGRHVD  
TIFNIVDVKGEGCHAGGVAGGEMQGWRVQGLRLSQLTSDTLRFQRTKTDQD  
HYPEMLAHVAVVNAPPVFRLVWGMILGPNYLSALEQWIEPDNLLPLFAAEEAPK  
GLLHLTALRASPGDGPVAVSADITPMPAAAAGVGAAGYVGSGRVWCREGAPGA  
GSSGNTAGPPAPLPAAALAAAAGVAGSQDCSLGGTGRQQGSIRTLMPPPDSP  
PPGRCGDPTCPGCGSGCAVM

>NP\_974390 (AT3G46450)

MGDNSGRSRNSMMATVSSGKELLPKRSLVAAIPRAVQQTISKHVSFSGNRF  
SGTARNAAVFLLKIAVLEVRRVSKAKCPHLWNSLQALQCLCYPPLKWIQRWA  
PFKELINAMQLLCVIVMQMLSRPLLITIAEALTDQSELKQEASGGTNSHASSES  
ESQSDSQTQLQSPDIRIEDEAPLPVISQDWLRKLYEELKQRLSLPERLNEDELH  
RFYRVSNGDFTSLLSSIKKTIHWRETYRILSEEELETWSSLLFWHGYDKNQRPC  
LIVRLGLAFLKLPHERPRFAQAIISQVEHGVHLHLLTPENSELTVLVDCEGLSPLR  
IPMQMMRSCSSILQDHFNPRLGCLFIIRLPPVVRVISQTFIQILRPTTRKKLRIEGE  
TFHRVLSEYLQTLPSYLG SNCNCKRCSNLNEQDPPQPQTHPRRKRRSSSETEK  
LDDSHWSYNAQTPDLSYEDEPSLNICSQVLR TAVVFLMIWLF GALLAGFADPE  
SRPF

>NP\_177670 (AT1G75370)

MSGSLDRFARPCFEGVSSNDERRERRSDFEVSEDEKKTRIGNFNFKKKAAS  
SKLRHSLKKKGSSRRRSDRTFSLTIEDIH DVEELRAVDEFRNLVSENLLPPTL  
DDYHIMLRFLKARKFDIGKTKLMWSNMIKWRKDFGTD TIFEDFEFEEFDEVLY  
YPHGYHGVDKEGRPVIYERLGLVDPAKLMQVTTVERFIRYHVREFEKT VNIKLP  
ACCIAAKRHIDSSTTILDVQGVGFKNFSPARDLIIQLQKIDNDNYPETLHRMFIIN  
GGSGFKLWATVKQFLDPKTVTKIHVIGNKYQNKLEIIDASQLPDFLGGTCTCA  
DRGGCMRSDKGPWNDPEILKMLQSGGPLCRHNSALNSFSRVSSCDKPSFSGI  
KASDTSTAESGSEVEEMASPKVNREL RVPKLT PVEDIRGTAISYPTDSSEYDS  
PMVDKVV DVAWMAHEKPKASKGSEDTPDSGKIRT VTYIWRWLMMFFVNLFTLL  
ISLALPQREGHSQSSESSVDGPNARES RPPSPAFATIAERNV FSSV VNR LGDLEK  
QVETLHSKRHEMPREKEELLNTAVYRVDALAEIATKKALHEALMRQDDLLAYI  
DREEDEKYHKRIHLRGFCWENRKR RFVNTNPIERTMFISKIRSHKQRFDTFGGN  
FRRMFFQLIFKVHFYLYQ

>NP\_564092 (AT1G19650)

MSGPLDRFTSPCF SNGEKREKKSDFEVSEDEKKTRIGGILKKKSSKSKFRHSL  
KRRGSRSIDRTL SLTFEDIHDAEELRYVSEFRQSLISDHLLPPNLDDYHIMLRFLF  
ARKFDLGKAKLMWTNMIQWRRDFGTD TILED FEFPELDEV LRYYPQGYHGVDK  
EGRPVIYERL GKVDASKLMQVTT LERYLRYHVKEFEKTITVKFPACCIAAKRHID  
SSTTILDVQGLGLKNFTKTARDLIIQLQKIDSDNYPETLHRMFIINAGSGFKLLWG  
TVKSFLDPKTVSKIHVLGNKYQNKLLEMIDASQLP DFFGGTCTCADQGGCMRS  
DKGPWKDSEILKMGRSGGTF CRHAGAF LSSDSQISSDKPTYSLKVS DTSTAK  
SGSELEEMASPKTNTN NHV PKLTPVSEYANGNISPTVLSEYE ECVPMVDKVV D  
VAWQLQEMP NASEGPQYTSSLGKIGSVRHIWSWLT AFFISFFTLLASLALPQTK  
EHSQLHSSSVRAELCDERIAESRPPSPPRSTITERVISSVLSRLGDLEKQIENL

HSRKSEMPHEKEELLNAAVYRVDALAEALITTKKALHEALIRQEELLGYIDRQKE  
AKCRRKKFCW

>NP\_849815 (AT1G55690)

MSGVEEISTLDEFRRERSDFEISEDERRRRSKIGNLKKKAINASTKFTHSLKKRGK  
RKIDYRVPVAVSIEDVRDEKEESVLEFRKLLERDLLPPRHDEYHTLLRFLKARD  
LNIEKTTQLWEEMLRWRKEYGTDILEDDFEELVQYYPQGYHGV DKEGR  
PVYIERLGKAHPSKLMRITTIDRYLKYHVQEFERALQEKFPACSAAKRRICSTTTI  
LDVQGLGIKNFTPTAANLVAAMSKIDNSYYPETLHRMYIVNAGTGFKKMLWPAA  
QKFLDAKTIKIHVLEPKSLFKLHEVIDSSQLPEFLGGSCSCFGDGGGCLRSNK  
GPWNDPEIMKLIYHGESSLFRQSTRKLTDPHYSSSYISIHPSKAIQAETSAEISIS  
CSDVPSSPTGRLCSASSHVNSAYEEARASDVNGYSCDDKFAIPDKATNRKQG  
ERQSQYQMRELNATTIGLKCETSSPGAPIIRWLHDLRVMIDKIKCENLAKRLLSL  
MLKLAAVFRYTPLELLRSQTTVSPSSLTEDDSRCSLISPPPREPTMKDRILPCLE  
RIQKLEKSYEDIRNKPAIPVEKERMLMDSLDRIKSVEFDLDTKRLHATVMKQ  
MEITEMLQNIIRDSQLHRRRRLFC

>NP\_201111.2 (AT5G63060)

MSIRFSSTIVAASVNFKSSKNLNINRSRNCRFVSRSCVSESQHAHKLVLVKERL  
AKDCTSLPLGKYGRDDEDMILWFLKDRRFVDEAIGKLTAKIKWRHEFKVDELS  
EDSIKAATDTGKAYVHGFLDVKGRPVVIVAPAKHIPGLLDPIEDEKLCVFLLEKAL  
SKLPAGQHILGIFDLRGFGSQNADLKFLTFLDFVFYYPYPSRLDEVLFVDAPFIF  
QPIWQFTKPLVKQYASLVKFCSAETVRKEYFTEETLPSNFRS

>NP\_192609.1 (AT4G08690)

MNTNPVTNGFVKPVPTEEEEQAKIEEVRKLLGPLPEKLSSEFCSDDAVLRYLARN  
WHVKKATKMLKETLKWVQYKPEEICWEEVAGEAETGKIYRSSCVDKLGRPVL  
IMRPSVENSKSVKQIRYLVCMENAVQNLPPGEEQMVWMMIDFHGYSLANVSL  
RTTKETAHVLQEHYPERLAFVLYNPPKFFEPFWKVARPFLEPKTRNKVKFVYS  
DDPNTKVIMEENFDMKELAFGGNDDSGFNIEKHSERMKEDDKRLASLEGI  
VSASLDSLSILSVSDGTASNSAHPSSHVDSEDEH

>NP\_173637.3 (AT1G22180)

MNSDSNKSSSNGFEKSLTPEEYLNKINEVRTLLGPLTEKSSEFCSDAAITRYLAA  
RNGHVKKATKMLKETLKWRAQYKPEEIRWEEIAREAETGKIYRANCTDKYGR  
VLVMPRSCQNTKSYKGQIRILVYCMENAILNLPDNQEQMVWLIDFHGFNMSHIS  
LKVSRETAHVLQEHYPERLGLAIVYNPPKIFESFYKMVKPFLEPKTSNKVKFVYS  
DDNLSNKLLEDLFDMEQLEVAFGGKNSDAGFNFEKYAERMREDDLKFGNTTV  
SSTSAHLTNSDSEVSDSEMKYLEDKEDETIENGLQSPDLTTKT

>NP\_171669 (AT1G01630)

MENKETKQEPAAAAEQKTVPLIEDEIERSKVGIMRALCDRQDPETKEVDDLIR  
RFLRARDLDIEKASTMFLNYLTWKRSMPLKGHIPAEIANDLSHNKMCMQGH  
KMGRPIAVAIGNRHNPSKGNPDEFKRFVYVYTLKICARMPRGQEKFVAIGDLQG  
WGYSNCDIRGYLAALSTLQDCYPERLGKLYIVHAPYIFMTAWKVIYPFIDANTKK  
KIVFVENKLTPTLLEDIDESQLPDIYGGKLPLVPIQET

>NP\_177653.1 (AT1G75170)  
MFRWKNSSQTEQEKEAALREAKMKELKTLIGQLSGRNSLYCSDACLKRYLEA  
RNWNVGKAKKMLEETLKWRSSFKPEEIRWNEVSGEGETGKVYKAGFHDRHG  
RTVLILRPGLQNTKSLENQMKHLVYLIENAILNLPEDQEQMSWLIDFTGWSMST  
SVPIKSARETINILQNHYPERLAVAFLYNPPRLF EAFWKIVKYFIDAKTFVKVKFV  
YPKNSESEVELMSTFFDEENLPTEFGGKALLQYNYEEFSKQMNQDDVKTANFW  
GLGHSNNQLHASNGFSGAEIAPEPIQNHP

>NP\_195382.1 (At4g36640)  
MFRRRNAHQLDNDDSQQDNKVRELKSAIGPLSGHSLVFCSDASLRRFLDARN  
WDVEKAKKMIQETLKWRSTYKPEIRWNQVAHEGETGKASRASFHDRQGRVV  
LIMRPAMQNSTSQEGNIRHLVYLLENAIINLPKGQKQMSWLIDFTGWSMAVNPP  
MKTTREIIHILQNYPERLGIAFLYNPPRLFQAVYRAAKYFLDPRTAEKVKFVYPK  
DKASDELMTTHFDVENLPKEFGGEATLEYDHEDFSRQMYEDDLKTAKYWGLE  
GKHYPKTNGFSPSDVPEPAIEIASAAS

>NP\_172029.2 (AT1G05370)  
MGKKEQKDHHSVWESDDKVEAVLHLLRKHSPLTLKQEKFCNRACVGRFLRIKG  
DNVKKAAKQLRSCLSWRSSLGIESLIADEFTAELAEGLAYVAGLDDECRPVLV  
RIKQDYQKLHTQQLTRLVVFTLEVAISTMSRNVEQFVILFDASFFKSASAFMNIL  
VTTLKIVA EYPCRLFKTFVIDPPSLFSYLWKGIRTFVDLSTATMIVSMQDFQDSF  
DYDDFSSSYPSRVSSLRFDTSLLKSTDKIGSCASSRFAFTVSRDGLDTVKPWCL  
TLTDTSSSTKLGHNTGAYISPLNARSFSFASPAARSEPFGGPRRSFFASTPMPAR  
TTDRHSIGTLRDPRI PRPSFFQSPAIFFRRESHVSKSEKPRDSFVQFLKFYRRPY  
DEMTYRSKMRPPLGGLVSIVSTQIRRRHVSLSQRF

>NP\_188880.1 (AT3G22410)  
MGKKDEKVEAVLRLVKKQSPLTFKQEKFCNRECVFLKVKGDNVKKAQKLS  
SCLSWRQNFDIERLGAEEFSTELSDGVAYISGHDRESRPVIFRFKH DYQKLHT  
QKQFTRLVAFTIETAISSMSRNT EQSFVLLFDASFFRSSSAFANLLLATLKIIADNY  
PCRLYKAFIIDPPSFFSYLWKGVRPFVELSTATMILSSLDYDEPLDITHVSSNPRS  
TSLRFDASSIKSTASIGSASSRFAFTVSQNSLKPWYLSFTDTSPYNPAVSSSAAA  
PVSPLSARSLPFASPAVRGFKDAKPAACRKS LFPSTPLPEKTKTVSYRKT PRPS  
FFQSPAMFFRRENNVGGGGEKSREAFVPYLKFYRRPYDETAYRSKLRGPRGF  
LSVSSHRRSRHVSLSQRF

>NP\_973831.1 (AT1G14820)  
MEESQELALTQLRKSVEKLSSTEGYDKPTLMRFLVARSM DPVKAAMFVDW  
QKWRASMVPPTGFIPSEVQDELEFRKVCLQGPTKSGHPLVLVITSKHFASKDP  
ANFKKFVYALDKTIASGNGKEVGGEKLVAVIDL ANITYKNLDARGLITGFQFL  
QSYPERLAKCYILHMPGFFVTWVKFVCRFLEKATQEKIVIVTDGEEQRKFEEEI  
GADALPEEYGGRAKLTAIQDVLLPQAAPVTLTNNNV

>NP\_190735.1 (At3g51670)

MDASLSPFDHQKTQNTEPKKSFITSLITLRSNNIKEDTYFVSELKPTEQKSLQEL  
KEKLSASSSKASSMWGVSLGGDDKADVILLKFLRARDFKVADSLRMLEKCLE  
WREEFKAEKLTEEDLGFKDLEGKVAYMRGYDKEGHPVCYNAYGVFKEKEMYE  
RVFGDEEKLNKFLRWVQVLERGVKMLHFKPGGVNSIIQVTDLKDMPKRELRV  
ASNQILSLFQDNYPELVATKIFINVPWYFSVIYSMFSPFLTQRTKSKFVMSKEGN  
AAETLYKFIRPEDIPVQYGGLSRPTDSQNGPPKPASEFSIKGGEKVNIEGIEG  
GATITWDIVVGGWDLEYSAEFVPNAEESYAIVVEKPKMKATDEAVCNSFTTVE  
AGKLILSDNTLSRKKKVAAYRYTVRKSTTTV

>NP\_179410.1 (AT2G18180)

MSLNVLDVCLERPNCVCSFKKRSCSKLSCSLTKKRRSSKVMSVEIFEDEHDA  
EELKVVDVAFRQVLILDELDPKHDDYHMMLRFLKARKFDLEKTNQMWSMLRW  
RKEFGADTVMEDFEFKEIDEVLKYYPQGGHHGVDKEGRPVYIERLGQVDSTKLM  
QVTTMDRYVNYHVMFEFERTFNKFPACSAIAKKHIDQSTTILDVQGVGLKNFNK  
AARDLITRLQKVDGDNYPETLNRMFIIINAGSGFRMLWNTVKSFLDPKTTAKIHVL  
GNKYQSKLLEIIDASELPEFLGGSCCADNGGCMRSDKGPWNNPDIMKRVNNG  
DHICSKRSQADNAGENIISQGNNSAVEEAPETDQSQPSPCQNVVVAHPAWNIP  
EAHKFSLSKRDVYAIQEACKATNESGRSPIFTGVMAFVMGVVTMIRVTKNVPRK  
LTESTIYSSPVYCDENSMNKSSMHGKKMATTTISGEDFMAVMKRMARELEQKVT  
NLSAQPATMPPEKEEMLNAAISRADFLEQELAAATKKALDDSLTRQEDLVAYVER  
KKKKKKLVRFQINAYLTNFCFGV

>NP\_175980 (AT1G55840)

MSITNEEAVKQLRALMEDVDDSLRESYRNIHQGYPTENLLRFLKARDGNVQKA  
HKMLLECLEWRTQNEIDKILTKPIVPVDLYRGIQDQLVGVSGYSKEGLPVIAIGV  
GLSTYDKASVHYYVQSHIQMNEYRDRVLLPSASKKQGRPICTCLKILDMSGKLL  
SALSQIKLMTAITTIDDLNYPEKTETYYVNVNVPYIFSACWKTIKPLLQERTKKKIQV  
LKGCCKDELLKIMDYESLPHFCRREGSGSGRHHISNGTVDNCFSLDHSFHQDLY  
DYVKQQALVKGSGAPIRHGSVHVKFPEPDTEGNKIFDTLENEFQKLGNDQKI

>NP\_199584.1 (At5g47730)

MGIVSEEAIDEFQELMDQVEEPLKKTIERVHQGYLRENLGRFLKARDWNVCKA  
HTMLVECLRWRVDNEIDSILSKPIVPTELYRDVDRDSQLIGMSGYTKEGLPVFAIG  
VGLSTFDKASVHYYVQSHIQINEYRDRVLLPSISKKNRPIITCVKVLDMTGLKL  
SALSQIKLVTIISTIDDLNYPEKNTNTYYVNPYIFSACWKVVKPLLQERTRKKVH  
VLSGCGRDELLKIMDFTSLPHFCRSGSSGSSHHTQSANCF SINHPFHQQLYNY  
VKHHYETQGQAEPKQGSFHVGFPEPEAERCVIKTIKIESELHKFENRGLAVSI  
DDRKSSHETLANGDL

>NP\_565514 (AT2G21540)

MTDTMSAHMDRHNKLDYDGESEDEKKTCLCSLKKKAINASNKFKHSFTKRTRRN  
SRVMSVSIVDDIDLEELQAVDAFRQALILDELPSKHDDHHMMLRFLRARKFDLE  
KAKQMWTDMIHWRKEFGVDTIMEDDFEKEIDEVLKYYPQGYHGVKDGPRVYI  
ERLGQVDATKLMQVTTIDRYVKYHVREFEKT FNILKPACSAIAKKHIDQSTTILDV  
QGVGLKSFSKAARDLLQRIQKIDSDNYPETLNRMFIIINAGSGFRLLWSTVKSFLD  
PKTTAKIHVLGNKYQSKLLEIIDSNELPEFLGGNCTCADKGGCMRSDKGPWND

PDIFKMVQNGEGKCPKRTLSNIEEKTISVDENTTMKSDSFAKNKFDAENTKFIPM  
IDKTVNASTWPTNLHKSNYPEPEDLYSAVKPSQRRGGEGYLFGGVMSLVMGL  
MTVVRLTKNMPKRLTEAAIYGGEVDKAETTMVSNQEYMSMVKRMAELEEKCR  
SLDNQPAAFSPEKEQILTAALSRVDELELQLAQTKKTLEETMATQHVIMAYIDKK  
KKKKKFFGF

>NP\_568054 (AT4G39170)

MSGPVDRFAIPCFEGILSSDEKKERKSDFENSEDERRTRIGSLKKKAINASTKFK  
HSLKKKRRKSDVRVSSVSIEDVRDVEELQAVDEFRQALVMEELLPHKHDDYHM  
MLRFLKARKFDIEKAKHMWADMIQWRKEFGTDTIIQDFQFEEIDEVLKYYPHGY  
HSVDKEGRPVYIERLGKVDPNKLQVTTLDRIYHVKEFERSFMLKFPACTIA  
AKKYIDSSTTILDVQGVGLKNFTKSARELITRLQKIDGDNYPETLHQMFIINAGPG  
FRLWSTVKSFLDPKTTSKIHVLGCKYQSKLLEIIDSSELPEFLGGACTCADQGG  
CMLSDKGPWKNPEIVKMVLHGGAHRAKQVVKVLSGDKVIAYAKPSYPWIKGS  
DTSTAESGSEAEDIVVSPKAVKSYSHLRLTPVREEAKVGSGETSFAGSFAGYDE  
YVPMVDKAVDATWKVKPTAINRAPSKGAHMPPNPKDHESFSARVLVTFMAFV  
MAILTFFRVSNRVVTKQLPPPPSQPQIEGSAAAEADLLNSVLKLTLEEKIG  
ALQSKPSEMPYEKEELLNAAVCRVDALEELIATKKALYEALMRQEELLAYIDRQ  
EAAQHQQKNKRKQMFCE

>NP\_195629.2 (AT4G39180)

MADTMVAHMDRHNKIDVEISEDKRLTKLCSLKKKAINATNFKHSMTKKRRH  
SRVACVSIVDEIDTEELQAVDAFRQALILDELLPSKHDDHHMMLRFLRARKFDLE  
KAKQMWSMLNWRKEYGADTIMEDDFDFKEIEEVVKYYPQGYHGVVDKEGRPIYI  
ERLGQVDATKLMKVTTIDRYVKYHVKEFEKTFNVKFPACSAAKRHIDQSTTILD  
VQGVGLSNFNKAAKDLLQSIQKIDNDNYPETLNRMFIIINAGCGFRLLWNTVKSFL  
DPKTTAKIHVLGNKYQTKLLEIDANLPEFLGGKCTCADKGGCMRSDKGPWND  
PEIFKLQNGEGRCLRRSLSGIEEKTIFEYNNETKKKCEPEETHKQSAEMEKK  
FIDTNVDAAAAADWPTKLNKAENPTDLKDVYSAVNPLERKGYLYGSVMALLM  
GIVGVMRLTKNMPRRLTEANVYSREGSAVYQDGVTVMSKQEYIAMVKKITDLE  
EKCKSMEAQAAFYMEREKTLDAALRRIDQLELQLSETNKALDETMTRQHEIMAF  
IEKKKKKKRKFLLF

>NP\_195184 (AT4G34580)

MAETKPEIEMSEEERKIVKISSLKKKAINASNRFKNSFKKKGRRSSSRVMSVPIE  
DDIDAEDLQALDAFRQALILDELLPSKLDDLHMMLRFLRARKFDIEKAKQMWS  
MIQWRKDFGADTIIEDDFEIDEVMKHYPQGYHGVVDKEGRPVYIERLGQIDAN  
KLLQVTTMDRYVKYHVKEFEKTFKVKFPSCSVAANKHIDQSTTILDVQGVGLKN  
FSKSARELLQRLCKIDNENYPETLNRMFIIINAGSGFRLLWSTVKSFLDPKTTAKI  
HVLGNKYHSLLEVIDASELPEFFGGACTCEDKGGCMRSDKGPWNDPEVLKIAI  
NREAKCSPISEDEHKHVDQGRSTSGFESLERIKKKTDEDNVYEKQIATIDKSM  
MAWLAKTQKAENFPISKGLECYVRKGAPKKGDGLLVGGVMAFVMGIVAMVRLS  
KDVPRKLTAAALYGNVVCYEEESTKSKQNQGQFAAPVSSSEYMLMVKRMAELE  
DKCMFLDLKPAHVESEKEEKLQAALNRVQVLEQELTETKKALEEALVSQKEILA  
YIEKKKKKKLFFGF

>NP\_564360.1 (AT1G30690)

MTAEVKVEEKQVESEVVIAPAVVPEETTVKAVVEETKVEEDESKEPEGVEKSASF  
KEESDFFADLKESEKKALSDLKSKLEEAIVDNTLLKTKKKESSPMKEKKEEVVKP  
EAEVEKKKEEAEEKVEEEKKSEAVVTEEAPKAETVEAVVTEEIIPKKEVTTVVE  
KVEEETKEEEKKTEDVVTEEVKAETIEVEDEDESVDKDIELWGVPLLPKGAES  
TDVILLKFLRARDFKVNEAFEMLKTKLWRKQNKIDSILGEEFGEDLATAAYMNG  
VDRESHPVCYNVHSEELYQTIGSEKNREKFLRWRFLMEKGIQKLNLPKGGVT  
SLLQIHDLKNAPGVSRTIEWVGIIKVIETLQDNYPEFVSRNIFINVPFWFYAMRAV  
LSPFLTQRTKSKFVWARPAKVRETLKYIPADELPVQYGGFKTVDDTEFSNETV  
SEVVVKPGSSETIEIPAPETEGTLVWDIAVLGWEVNYKEEFVPTTEEGAYTVIVQK  
VKKMGANEGPIRNSFKNSQAGKIVLTVDNVSGKKKKVLYRYRTKTESS

>NP\_179747 (AT2G21520)

MSGPLDRFARPCFEGFLSSDEKKERKSDFENSEDERRTRIGSLKKKAINASTKF  
KHSLKKKSGRRKSDGRVSSVSIEDVRDVEELQAVDAFRQSLLMDELLPDRHDD  
YHMMLRFLKARKFDVEKAKQMWADMIQWRKEFGTDTIIQDFDFEINEVLKHY  
PQCYHGVDKGRPIYIERLGKVDPNRLMQVTSMDRYVRYHVKEFERSFMIFP  
SCTISAKRHIDSSTTILDVQGVGLKNFNKSARDLITRLQKIDGDNYPETLHQMFI  
NAGPGFRLWNTVKSFLDPKTSAKIHVLGYKYLKLEVIDVNELPEFLGGACTC  
ADQGGCMLSDKGPWKNPEIVKMLVHGGAHRRARQVVKVLNSEGKVIAYAKPSY  
TWIKGSDTSTAESGSDAEDIGSPKAIKSFHLRLTPVREEAKIAGETSLAGSFPG  
YDEYVPMVDKAVDATWKVKPAIQRVASRGALMSPTVPKDHEGIKARVLMFMA  
FLMAVFTFFRTVTKKLPATTTSSPAETQGNAILGSGEGVKEECRPPSPVPLD  
TETDLLNCVTKKLETELEGKIGTLQSKPNEMPYEKEELLNAAVCRVDALEAELIAT  
KKALYEALMRQEELLAYIDRQEEAQFQKMKKKKKKHLFCF

>NP\_199562 (AT5G47510)

MQETDRDIHISDGTMNKEEQSPNNEEMVEAFRNLLLLHGHLPDKHGDHNTLRR  
FLKMRDFDLEKSKEAFLNYMKWRVDYKVDLISQKFKFEEYGEVKKHYPHGFHK  
VDKTGRPIYIERLGMTDLNAFLKATTIERVYNYHIKEQEKTMSLRYPACSIASDKH  
VSSTTTILDVSGVGMNSFSKPARSLFMEIQKIDSNYYPETLHRLFVFNASSGFR  
MLWLALKTFLDARTLAKVQVLGPNYLGELLEAIEPSNLPTFLGGNCTCSDHGGC  
LFSDEGPWNDPGIKEKIEEPSTIEDAHSETMDKVSENAPANQKESLGEVMITME  
KYAALKTAVKDSQKRIEMLEISLHETKKVNLGLAEIIEAIQPNQPITKCKPV

>NP\_189128 (AT3G24840)

MPALGEILLVPETDKGKSKDYIEVSEDEKITRTRRSRLKKKAIKASNKLTHSLRKR  
GKRVDQYAPIVIEDVRDEEEEKAVNVFRKALVSLDLLPPRHDDYHTMLRFLKA  
RRFDLEKTVMWEEMLKWRKENGVDIIQDFVYDEYEEVQQYYPHGYHGVD  
EGRPVIYIERLGKIDPGKLMKVTTLERFLRYHVQGFECTFSEKFPACSIAAKRHIN  
SSTTIIDVHGVSWMSFRKLAQDLVMRMQKIDGDNYPETLNQMYIINAGNGFKLV  
WNTVKGFLDPKTTSKIHVLGNKYRSHLLEIIDPSELPEFLGGNCKCAHEGGCMR  
FNKGPWNDPEIMKLVRSRDAMYKPKEMGLENGEVAKLFSLRHVNTDMSSPD  
GGHVRERESHPEHDKRAQLSNQAEAVGVGRMEQSDSTSPLPNNLAVERSLTT  
SLQKVASFILARFILQLLGSCLMFRILGRLVKNQPENQLRPELSVSVSQQVPP

PQVHPCWLRLQNLETMTVLCDKPSSIPQEKEDILRDSLDRIKSIEQDLQKTKKA  
LFLTASKQIELAECFENLKESSTGMRSCWPRHCRNFQAET

>NP\_568006.1 (AT4G36490)

MTLIQDAELKPRMGSFKKRSSSKNLRYSMTKRRRSSKVMSVEIIEDVHDAEELK  
AVDAFRQSLILDELLPEKHDDYHMMLRFLKARKFDLEKTKQMWTEMLRWRKEF  
GADTVMEEFDFKEIDEVLKYYPQGGHHGVDKEGRPVYIERLGLVDSTKLMQVTT  
MDRYVNYHVMFERTFNVKFPACSAAKKHIDQSTTILDVQGVGLKNFNKAARD  
LITRLQKVDGDNYPETLNRMFIINAGSGFRMLWNTVKSFLDPKTTAKIHVLGNKY  
QSKLLEIIDESELPEFLGGSCCADNGGCMRSDKGPWKNPEIMKRVHNGDHKC  
SKGSQAENSGEKTIPEEDDSTTEPASEEEKASKEVEIVPAAHPAWNMPEAHKF  
SLSKKEVYAIQEACNNATTEGGRSPIFTGVMALVMGVVTMIKVTKNVPRKLTES  
TLYSSPVYCDASMNKSAMQSEKMTVPAISGEDFMAIMKRMAELEQKVTVLSA  
QPTVMPPDKEEMLNAAISRSNVLEQELAATKKALDDSLGRQEELVAYIEKKKKK  
KKLFNYW

>NP\_173669 (AT1G22530)

MAQEEIQKPTASVPVKEETPAPVKEVEVPVTTEKAVAAPAPEATETKKEETPV  
APAPVETKPAAPVVAETKKEEILPAAPVTTETKVEEKVVPVETTPAAPVTTETKE  
EKAAPVTTETKEEKAAPGETKKEEKATASTQVKRASKFIKDIFVSVTTSEKKK  
EEEKPAVVITIEKAFAADQEEETKTVEAVEESIVSITLPETAAYVEPEEVSIGIPL  
EDERSDVILLKFLRARDFKVKEAFTMLKNTVQWRKENKIDDLVSEDLEGSEFEK  
LVFTHGVDKQGHVVIYSSYGEFQNKEIFSDKEKLSKFLKWRIQFQEKCVRSDF  
SPEAKSSFVFSDFRNAPGLGQRALWQFIKRAVKQFEDNYPEFVAKELFINVP  
WWYIPYYKTFGSIITSPRTRSKMVLGSPSKSAETIFKYVAPEVVPVKYGGLSKDS  
PFTVEDGVTEAVVKSTSKYTIDLPALEGSTLSWELRVLGADVSYGAQFEPSNEA  
SYTVIVSKNRKVGLTDEPVITDSFKASEAGKVITIDNQTFKKKKVLVRSKTQA

>NP\_200427 (AT5G56160)

MSGREQTGEKLSDSEYIEEPRRSRIGNLKKKAFSCSTKLTHPLKMRKGKRKID  
FQIPLIEDVRDEKEEKLVSCLRQQLLQKDLLPPVHDDYHMMLRFLKTMEFKIEKT  
VTAWEEMLKWRKEFGTDRIIQDFNFKELDEVTRHYPQGYHGVDKDGRPIYIERL  
GKAHPGKLMEVTTIERYLKYHVQEFERTLQEKLPACSVAAKRRVTTTTTILDVE  
GLGMKNFTPTAANLLATIAKVDCNYYPETLHRMFIVNAGIGFRSFLWPAAQKLL  
DPMTIAKIQVLEPRSLSKLLEAIDSSQLPEFLGGLCKCPNEGGCLRSNKGPNW  
PEIVELVHHMEVNNVPQTTTAPLHVRDYDSTTCTISPKETLKEEPEPEEYYSST  
GSRSSMHTCIVPPLSDKASTSDGDKFITTVESIESAQSQLLDADTENTFANTSVR  
EGGQILRFGALREKINSENIHFLVKILLVFPLKLFVLFGLLPGYWQRQNTVVVPD  
SSTNNKVLECFDRLKMEKEFTEISRKQVKIPEANEKLLAESLERIKSLELDLDT  
KSVLHITLTKQLQITEQLESQDEERRKGCFF

>NP\_565387.1 (AT2G16380)

MADTKQDMENSEDGRKLVKMSSLKQKAISASNRFKNSFKKKTRRTSSKIVSVA  
NTDDINGDDYLSVEAFRQVLVLDLLPPKHDDLHMMLRFLRARKFDKEKAKQM  
WSDMLQWRMDFGVDTIIEDFEFEEIDQVLKHYPQGYHGVDKEGRPVYIERLGQ  
IDANKLLQATTMDRYEKYHVKEFEKMFKIKFPSCSAAAKKHIDQSTTIFDVQGVG



LKNFNKSARELLQRLLKIDNDNYPETLNRMFIINAGPGFRLWAPIKKFLDPKTTTS  
KIHVLGNKYQPKLLEAIDASELPYFFGGLCTCADKGGCLRSDKGPWNPPELLKI  
ARNPEARFSTISEEDYLLVEEGTSMSMVFEPLERNKMKTIEENVSEKHIDAVDK  
FMALSLPPKPHLKT LRKGKEPQKKDDSFVGGVIAFVMGIVAMLRLSKAVPRKL  
TDVALLTNSVYEEAKMSKPNQDEVSAPPVSSSEYVIMVKRMAELEEKYKSLD  
SKSADEALEKDDKLQAALNRVQVLEHELSETKKALDETMVNQQGILAYIEKKNK  
KKRMFFRF

>NP\_177361 (AT1G72160)

MAEÉPTTTTLVTPEKLPSPSLTPSEVSESTQDALPTETETLEKVTETNPPETADT  
TTKPEEETA AEHHPPTVTETETASTEKQEVKDEASQKEVAEEKSMIPQNLGSF  
KEESSKLSDLNSEKKSDELKHLVREALDNHQFTNTPEEVKIWGIPLLEDDRS  
DVVLLKFLRAREFKVKDSFAMLKNTIKWRKEFKIDELVEEDLVDDLDKVVFMHG  
HDREGHPVCYNVYGEFQNKELYNKTF SDEEK RKHFLRTRIQFLERSIRKLD FSS  
GGVSTIFQVNDMKNSPGLGKKELRSATKQAVELLQDNYPEFVFKQAFINVPWW  
YLVFYTVIGPFMT PRSKSKLVFAGPSRSAETLFKYISPEQVPVQYGGLSVDPCD  
CNPDFSLEDSASEITVKPGTKQTVEIIIEKCELVWEIRVTGWEVSYKAEFVPEE  
KDAYTVVIQKPRKMRPSDEPVLTHSFKVNELGKVLLTVDNPTSKKKKLVYRFNV  
KPL

>NP\_177360.1 (AT1G72150)

MAQEEVQKSADVAAPVVEKPKITDKEVTIPTPVAEKEEVAAPVSDEKAVPEKE  
VTPEKEAPAAEA EKSVSVKEEETVVAEKVVLTAEVQKKALEEFKELVREAL  
NKREFTAPVTPVKEEKTEEKTEEETKEEEKTEEKKEETTTEVKVEEEKPAVPA  
AEEKSSEAAPVETKSEEKPEEKA EVTTEKASSAEEDGKTVEAIEESIVSVSPP  
ESAVAPVVVETVAVAEAEPEVEPEEVSIIWGVPLLQDERSDVILTKFLRARDFKVK  
EALTMLKNTVQWRKENKIDELVESGEEVSEFEKMFVAHGVDKEGHVVIYSSYG  
EFQNKELFSDKEKLNKFLSWRIQLQEKCVRAIDFSNPEAKSSFVFSDFRNAPG  
LGKRALWQFIRRAVKQFEDNYPEFAAKELFINVPWWYIPYYKTFGSIITSPRTRS  
KMVLGAPSKSADTIFKYIAPEQVPVKYGGLSKDTPLTEETITEAIVKPAANYTIEL  
PASEACTLSWELRVLGADVSYGAQFEPTTEGSYAVIVSKTRKIGSTDEPVITDSF  
KVGEPGKIVITIDNQT SKKKKLVYRFKTQ

>NP\_192655.2 (AT4G09160)

MSQDSATTT PPPPLTSDVSMPSGEEDEPKHVTSEEEAPVTSETNLKLPMPPEL  
EESNHTAEVVSEKVT PETMTLESEGLNHAAEDSEQTHEVTPETETAKLEVLNHT  
AEDSEQTHEVTP EKETVKSEFLNHVAEDSEQTHEVTPETETVKSEVLNHAED  
SEQPRGVTP TPETETSEADT SLLVTSETEEPNHAAEDYSETEPSQKLMLEQRR  
KYMEVEDWTEPELPDEAVLEAAASVPEPKQPEPQT PPPPPSTTTSTVASRSLA  
EMMNREEAEVEEKQKIQIPRSLGSFKEETNKISDLSETELNALQELRHLLQVSQ  
DSSKTSIWGVPLLKDDRTDVVLLKFLRARDFKPQEAYSMLNKT LQWRIDF NIEE  
LLDENLGDDLDKVVFMQGQDKENHPVCYNVYGEFQNKDLYQKTF SDEEKRER  
FLRWRIQFLEKSIRNLDFVAGGVSTICQVNDLKNSPGPGKTELRLATKQALHLLQ  
DNYPEFVSKQIFINVPWWYLA FYRIISPFMSQRSKSKLVFAGPSRSAETLLKYIS  
PEHVPVQYGGLSVDNCECNSDFTHDDIATEITVKPTTKQTVEIIVYEKCTIVWEIR

VVGWEVSYGAEFVPENKEGYTVIIQKPRKMTAKNELVSHSFKVGEVGRILLTV  
DNPTSTKKMLIYRFKVKPLACE
